# Supplementary material for: Structural Variability of Lipoarabinomannan Modulates Innate Immune Responses within Infected Alveolar Epithelial Cells
Source: Cells. 2022 Jan 21;11(3):361. doi: 10.3390/cells11030361 (PMC8834380; doi:10.3390/cells11030361)
Supplement: Supplementary file 1 [file cells-11-00361-s001.zip › cells-1528074-supplementary.pdf]

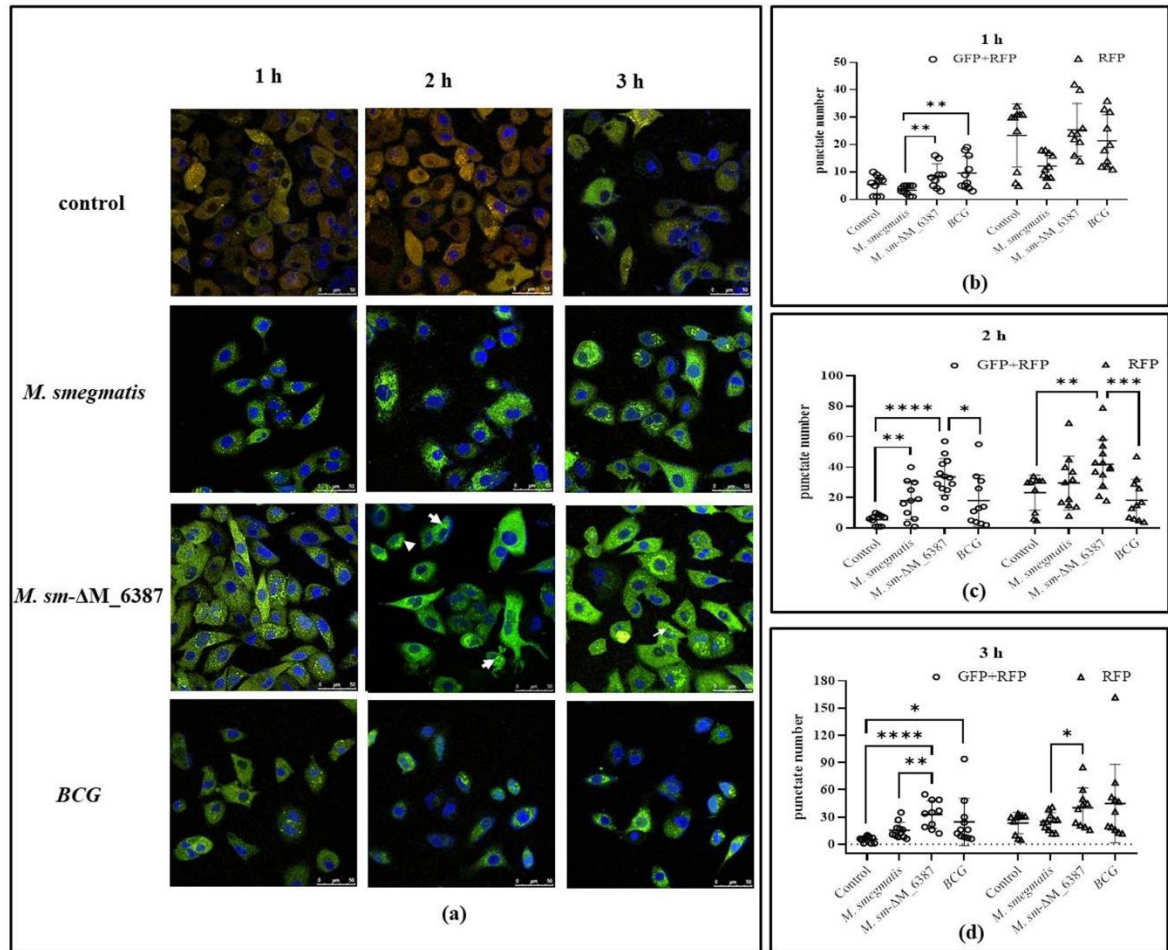

**Figure S1:** Confocal image of A549 cells transiently transfected by a lentiviral vector with tandem-tagged RFP-GFP-LC3 (A549<sup>LC3</sup>) post-infection. **(a)** A549<sup>LC3</sup> infected by *M. smegmatis*, *M. sm-ΔM\_6387*, or BCG for 1, 2, and 3 h, respectively (630×); white arrows point to LAPsome structures. **(b-d)** Dot plots showing yellow and red spot numbers within A549<sup>LC3</sup> cells treated by different mycobacteria; circles indicate the number of yellow punctates, and triangles point to red spots; the panels of b, c and d showed respectively 1, 2, and 3 h post-infection; the asterisks including \*, \*\*, \*\*\* and \*\*\*\* represents  $p < 0.05$  or lower.
